# Supplementary material
Source: PubMed Central journal article supplement (PMC2781652)

## SUPPLEMENTAL DATA

**Table S1 :** Sequences of the forward and reverse oligonucleotides used to generate the different minigene mutants and PCR amplify the open reading frame of the different SR proteins.

**Figure S1. The splicing product  $\alpha 2\Delta 9A$  is a potential substrate for non sense decay (NSD).** Nucleotide and derived amino acid sequences of the open reading frame encompassing exon 8 to exon 9B. The end of exon 8 and the beginning of exon 9B are written and the exon junction is indicated by the symbol (/). The hexanucleotide and the cleavage site of the  $\alpha$  poly(A) site are underlined and indicated by an arrow respectively.

**Figure S2. Localization of candidate SC35 binding sites in the intronic region encompassing UTE using ESE finder 3.** **A.** The organisation of the wild-type pre-mRNA region spanning exon 8 to exon 9A9' is diagrammed at the top. The position of UTE from -204 to -165 is given and the distant -274 branch site and its associated polypyrimidine tract are represented by a black circle and a black rectangle respectively. The intronic sequence from -253 to -131 upstream of exon 9A is written below and the predicted SC35 binding sites are diagrammed with bars. The height of the bars indicates the strength of the potential SC35 binding sites as calculated by the ESE finder software. **B.** Effects of UTE deletion upon candidate SC35 binding sites. **C.** Effects of UTE mutation upon candidate SC35 binding sites. The mutations are indicated related to the wild type sequence.

| name                                                        |         | sequence 5' - 3'                                        |
|-------------------------------------------------------------|---------|---------------------------------------------------------|
| <b>pActin.7-9B</b><br>$\Delta$ -204-165                     | forward | GTCCATTGATGATTTAGAAGG                                   |
|                                                             | reverse | AGGGTTGGAGACATTGGCAAGTGGAAGAGAAGCGGTGAAG                |
|                                                             | forward | TTGCCAATGTCTCCAACCCT                                    |
|                                                             | reverse | TGGAAAGGGTACGGAGGTAAGC                                  |
| <b>pActin.7-9B mut</b><br><b>UGGAUGG</b>                    | forward | GTCCATTGATGATTTAGAAGG                                   |
|                                                             | reverse | GAAACCAGTATAAGGGAAACAAGATGAGGATCAG                      |
|                                                             | forward | CTTGTTCCCTTATACTGGTTTCTTGCCAATGTCTC                     |
|                                                             | reverse | TGGAAAGGGTACGGAGGTAAGC                                  |
| <b>pActin.7-9B mut</b><br><b>UGGAUGG</b><br><b>+mut-196</b> | forward | GTCCATTGATGATTTAGAAGG                                   |
|                                                             | reverse | GATGAGGAAACAGACAGCGAGGAAGAGAAG                          |
|                                                             | forward | CGCTGTCTGTTTCCTCATCTTGTTTCCCT                           |
|                                                             | reverse | TGGAAAGGGTACGGAGGTAAGC                                  |
| <b>pActin.7-9B mut</b><br><b>BS + 3'cons</b>                | forward | GTCCATTGATGATTTAGAAGG                                   |
|                                                             | reverse | GGAAAAAAAAATAGAAGGAGAAAGGTAGAAG                         |
|                                                             | forward | CTCCTTCTATTTTTTTTCTCTCTCTCTT                            |
|                                                             | reverse | CATGTGGTACCAGACTAGAG                                    |
| <b>pActin.7-9B mut</b><br><b>BS</b>                         | forward | GTCCATTGATGATTTAGAAGG                                   |
|                                                             | reverse | GGAAAAAAAAATAGAAGGAGAAAGGTAGAAG                         |
|                                                             | forward | CTCCTTCTATTTTTTTTCTCTCTCTCTT                            |
|                                                             | reverse | GGAGGGGTAGGACAAAGAAATG                                  |
| <b>pActin.7-9B SPA</b>                                      | forward | GCAGCACCCAGCCAATTC                                      |
|                                                             | reverse | CCAACACACAGATCTAATGAAAATAAAGATCTTTTATTAAGTGGAAAGGGTACGG |
|                                                             | forward | TTCATTAGATCTGTGTGTTGGTTTTTTGTGTGCTTTTGGGTGTTTTTACCCCTG  |
|                                                             | reverse | CATGTGGTACCAGACTAGAG                                    |
| <b>xASF/SF2</b>                                             | forward | GGATCCATGGATACGTCAGCGGGC                                |
|                                                             | reverse | GCGGCCGCTGTACGAGAGCGAGATCTG                             |
| <b>xSC35</b>                                                | forward | GATATCTGAGCTACGGTCGGCCT                                 |
|                                                             | reverse | GCGGCCGCTGAAGACACTGCTCCCTC                              |
| <b>xSRp20</b>                                               | forward | GATATCATGCATCGTGA CTCTGT                                |
|                                                             | reverse | GCGGCCGCTTTTCGCTCATTGGACC                               |
| <b>x9G8</b>                                                 | forward | GATATCATGTCGCGTTACGGGCGA                                |
|                                                             | reverse | GCGGCCGCCATTTCTTTCTGGGC                                 |
| <b>hSRp30c</b>                                              | forward | GGATCCACCATGTCGGGCTGGGCGGACG                            |
|                                                             | reverse | GCGGCCGCGTAGGGCCTGAAAGGAGAG                             |
| <b>hSRp40</b>                                               | forward | GATATCCACCATGAGTGGCTGTCGGGTAT                           |
|                                                             | reverse | GCGGCCGCTATTGCCACTGTCAACTGATCT                          |
| <b>hSRp55</b>                                               | forward | GGATCCACCATGCCGCGCTCTACATAG                             |
|                                                             | reverse | GCGGCCGCATCTCTGGA ACTCGACCTG                            |

Exon 8      Exon 9B  
UUA GAA GAU AAA AUG CUU UGC UUC CAA UCG UCA CCU CUA UCC CAC CUG GGU UGG AUA AUC CUC UCU CAG  
L E D K M L C F Q W S P L S H L G W I I L S E  
CUG UCC UUU UUA UCC CAG UCU CUU CUU GGG AAC CUU UCA AAC UGU CCU GCU GCA UUA AAC AAG AAU CAC  
L S F L S Q S L L G N L S N C P A A L N K N H  
UUU UCU GUU GUA CAG ACA CUC UGU AAA AUA AAG GAC CCA CUG UGU AUU UUC↓UCU CGC CUU  
F S V V Q T L C K I K D P L C I F S R L

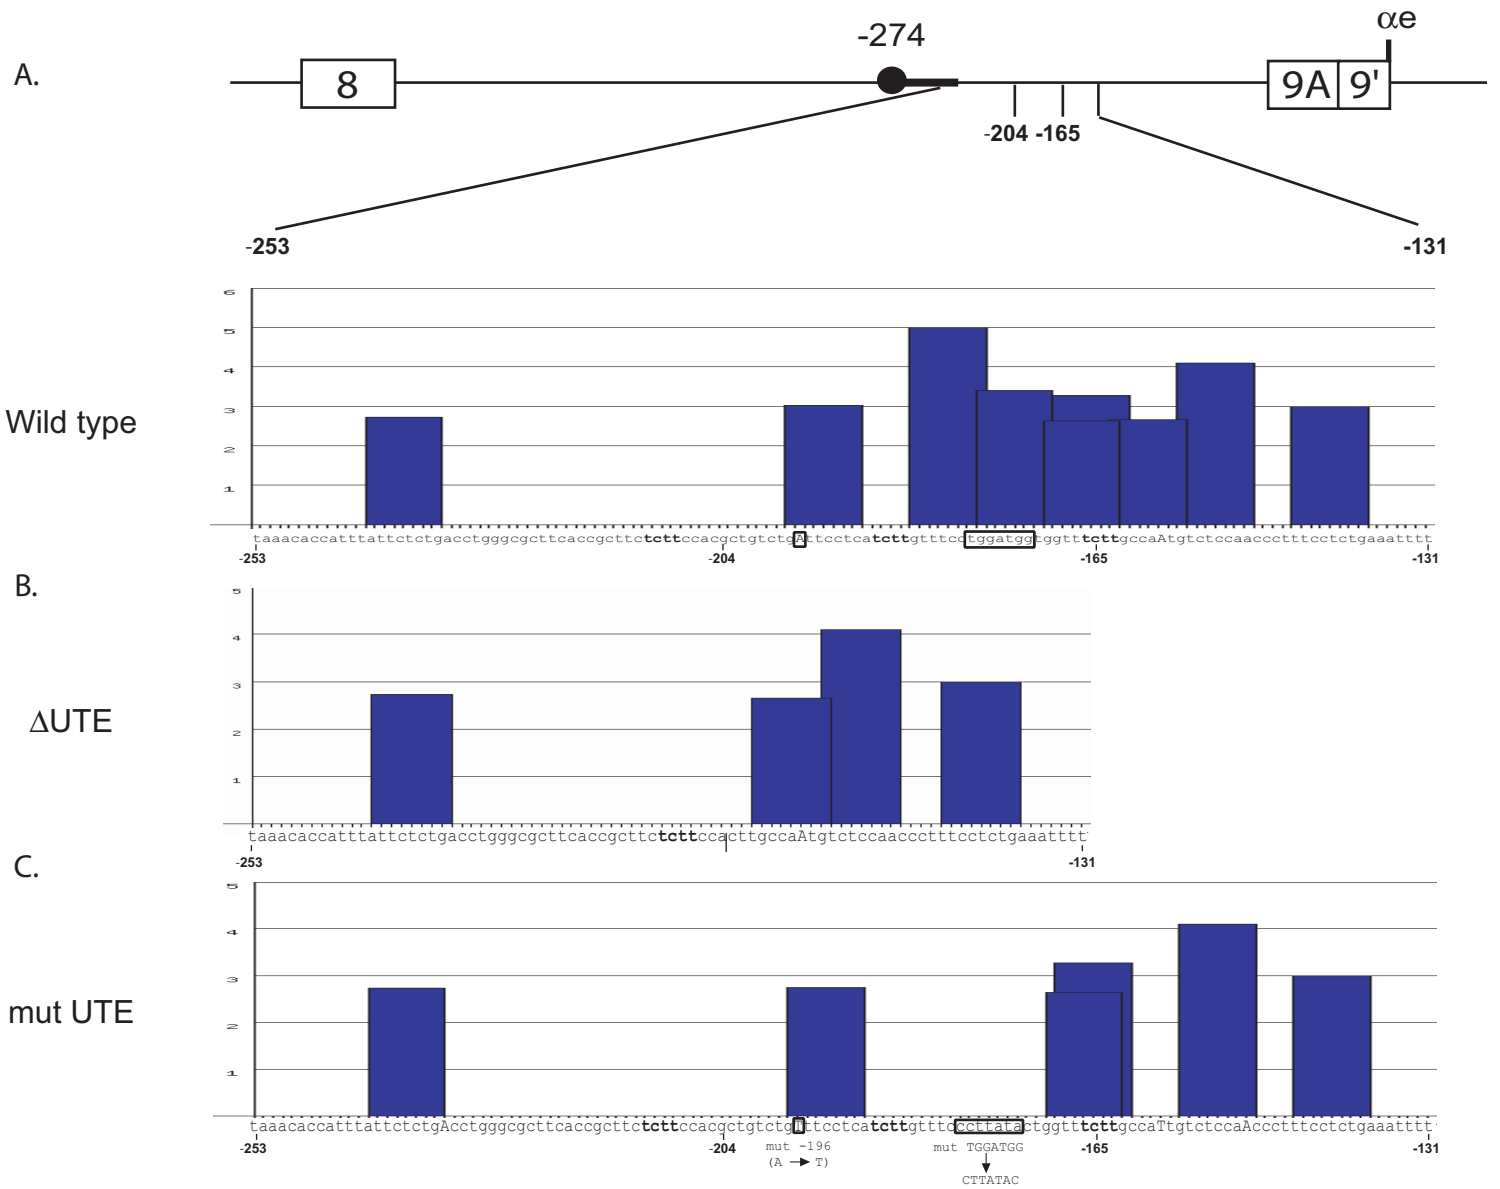

Supplement: supp_M109.029314_jbc.M109.029314-1.pdf [file supp_M109.029314_jbc.M109.029314-1.pdf]
